# Supplementary material for: The Occurrence and Chemical Composition of Bismuth-Bearing Minerals in the Niuxingba-Liumukeng Ag-Pb-Zn Deposit, Jiangxi Province, South China
Source: MDPI journal article supplement (doi:10.3390/min14010053), 2023-12-30
Supplement: s1 [file s1]

**Table S1.** Electron probe analysis results of minerals from the Niuxingba-Liumukeng deposit (wt%)

| Sample Name | Minerals         | As   | Au    | Fe   | Cu    | S     | Sb    | Zn   | Pb    | Ag    | Bi    | Cd   | Total  | Molecular Formula                                                                 |
|-------------|------------------|------|-------|------|-------|-------|-------|------|-------|-------|-------|------|--------|-----------------------------------------------------------------------------------|
| YK-22-1-1   | Uytenbogaardtite | 0.00 | 45.81 | 0.19 | 0.02  | 4.97  | 0.09  | 0.22 | 0.40  | 46.80 | 0.20  | 0.19 | 98.87  | Ag <sub>3.17</sub> Au <sub>1.70</sub> S <sub>1.13</sub>                           |
| YK-45-1-3   | Galena           | 0.00 | 0.03  | 0.00 | 0.20  | 10.29 | 0.02  | 0.25 | 87.59 | 0.45  | 1.10  | 0.00 | 99.92  | Pb <sub>1.14</sub> S <sub>0.86</sub>                                              |
| YK-24-2-3   | Emplectite       | 0.00 | 0.03  | 0.12 | 19.67 | 17.87 | 0.03  | 0.00 | 0.00  | 0.05  | 62.36 | 0.00 | 100.12 | Cu <sub>1.06</sub> Bi <sub>1.02</sub> S <sub>1.91</sub>                           |
| YK-24-2-5   | Emplectite       | 0.00 | 0.00  | 0.04 | 19.45 | 17.91 | 0.03  | 0.00 | 0.00  | 0.33  | 61.65 | 0.03 | 99.44  | Cu <sub>1.06</sub> Bi <sub>1.02</sub> S <sub>1.93</sub>                           |
| YK-24-2-6   | Emplectite       | 0.00 | 0.05  | 0.11 | 19.63 | 18.04 | 0.00  | 0.00 | 0.00  | 0.18  | 62.02 | 0.00 | 100.03 | Cu <sub>1.06</sub> Bi <sub>1.02</sub> S <sub>1.93</sub>                           |
| YKA-1-2     | Emplectite       | 0.00 | 0.00  | 0.01 | 19.58 | 17.96 | 0.01  | 0.00 | 0.00  | 0.07  | 62.13 | 0.00 | 99.77  | Cu <sub>1.06</sub> Bi <sub>1.02</sub> S <sub>1.92</sub>                           |
| YKA-1-1-2   | Berryite         | 0.00 | 0.00  | 0.00 | 6.72  | 16.45 | 0.04  | 0.00 | 20.20 | 7.56  | 49.85 | 0.00 | 100.80 | Pb <sub>2.95</sub> (Ag, Cu) <sub>5.32</sub> Bi <sub>7.22</sub> S <sub>15.52</sub> |
| YKA-1-1-3   | Berryite         | 0.00 | 0.00  | 0.00 | 6.60  | 16.24 | 0.04  | 0.00 | 19.91 | 7.23  | 49.10 | 0.00 | 99.11  | Pb <sub>2.95</sub> (Ag, Cu) <sub>5.25</sub> Bi <sub>7.22</sub> S <sub>15.57</sub> |
| YKA-1-1     | Berryite         | 0.00 | 0.00  | 0.02 | 6.97  | 16.11 | 0.03  | 0.00 | 20.19 | 7.37  | 48.43 | 0.02 | 99.12  | Pb <sub>3</sub> (Ag, Cu) <sub>5.47</sub> Bi <sub>7.12</sub> S <sub>15.43</sub>    |
| YK-24-2-4   | Berryite         | 0.00 | 0.00  | 0.10 | 6.78  | 15.96 | 0.02  | 0.00 | 20.62 | 7.74  | 49.22 | 0.05 | 100.48 | Pb <sub>3.05</sub> (Ag, Cu) <sub>5.47</sub> Bi <sub>7.22</sub> S <sub>15.26</sub> |
| YK-24-2-7   | Berryite         | 0.00 | 0.00  | 0.43 | 6.71  | 15.67 | 0.01  | 0.00 | 20.24 | 7.60  | 48.76 | 0.01 | 99.44  | Pb <sub>3.04</sub> (Ag, Cu) <sub>5.48</sub> Bi <sub>7.26</sub> S <sub>15.21</sub> |
| YK-45-1-4   | Aikinite         | 0.00 | 0.02  | 0.02 | 10.95 | 15.27 | 0.15  | 0.00 | 35.01 | 0.00  | 38.52 | 0.00 | 99.93  | Cu <sub>1.03</sub> Pb <sub>1.01</sub> Bi <sub>1.10</sub> S <sub>2.85</sub>        |
| YK-45-1-5   | Aikinite         | 0.00 | 0.00  | 0.06 | 11.63 | 15.35 | 0.16  | 0.00 | 34.91 | 0.01  | 37.36 | 0.00 | 99.46  | Cu <sub>1.09</sub> Pb Bi <sub>1.06</sub> S <sub>2.85</sub>                        |
| YK-45-1-2   | Aikinite         | 0.00 | 0.00  | 0.01 | 11.37 | 15.28 | 0.06  | 0.00 | 37.33 | 0.00  | 35.75 | 0.00 | 99.79  | Cu <sub>1.07</sub> Pb <sub>1.07</sub> Bi <sub>1.02</sub> S <sub>2.84</sub>        |
| YKA-1-3     | Aikinite         | 0.00 | 0.00  | 0.00 | 10.03 | 15.78 | 0.15  | 0.00 | 31.16 | 0.00  | 42.83 | 0.00 | 99.95  | Cu <sub>0.94</sub> Pb <sub>0.90</sub> Bi <sub>1.22</sub> S <sub>2.94</sub>        |
| YKA-1-4     | Aikinite         | 0.00 | 0.08  | 0.01 | 8.74  | 15.70 | 0.21  | 0.00 | 28.95 | 0.00  | 45.47 | 0.00 | 99.15  | Cu <sub>0.84</sub> Pb <sub>0.85</sub> Bi <sub>1.33</sub> S <sub>2.98</sub>        |
| YKA-16-2-5  | Argentite        | 3.34 | 0.00  | 0.05 | 4.98  | 13.92 | 4.28  | 0.00 | 0.00  | 73.26 | 0.00  | 0.28 | 100.11 | Ag <sub>1.83</sub> S <sub>1.17</sub>                                              |
| YKA-16-2-6  | Argentite        | 0.09 | 0.00  | 0.01 | 3.23  | 11.13 | 7.15  | 0.00 | 0.00  | 77.25 | 0.00  | 0.32 | 99.17  | Ag <sub>2.02</sub> S <sub>0.98</sub>                                              |
| YKA-16-2-1  | Argentite        | 3.56 | 0.06  | 0.00 | 5.05  | 14.07 | 4.24  | 0.00 | 0.00  | 73.18 | 0.00  | 0.25 | 100.40 | Ag <sub>1.82</sub> S <sub>1.18</sub>                                              |
| YKA-16-2-2  | Argentite        | 3.14 | 0.24  | 0.02 | 4.92  | 14.00 | 4.49  | 0.00 | 0.00  | 71.72 | 0.00  | 0.29 | 98.82  | Ag <sub>1.81</sub> S <sub>1.19</sub>                                              |
| YKA-16-2-3  | Tetrahedrite     | 5.53 | 0.00  | 2.12 | 25.57 | 24.74 | 19.77 | 1.77 | 0.00  | 19.33 | 0.00  | 0.69 | 99.52  | (Cu, Ag, Fe, Zn) <sub>11.34</sub> (Sb, As) <sub>4.14</sub> S <sub>13.52</sub>     |
| YKA-16-2-4  | Tetrahedrite     | 5.26 | 0.00  | 2.01 | 25.71 | 24.38 | 20.43 | 2.16 | 0.00  | 19.44 | 0.00  | 0.68 | 100.07 | (Cu, Ag, Fe, Zn) <sub>11.48</sub> (Sb, As) <sub>4.18</sub> S <sub>13.35</sub>     |
| YKA-16-2-7  | Tetrahedrite     | 0.58 | 0.00  | 0.76 | 24.20 | 23.29 | 27.07 | 3.66 | 0.00  | 19.61 | 0.00  | 0.39 | 99.54  | (Cu, Ag, Fe, Zn) <sub>11.54</sub> (Sb, As) <sub>4.20</sub> S <sub>13.26</sub>     |
